# Supplementary material for: Comparative analysis of chloroplast genome structure and molecular dating in Myrtales
Source: PubMed Central journal article supplement (PMC8122561; doi:10.1186/s12870-021-02985-9), 2021-05-15

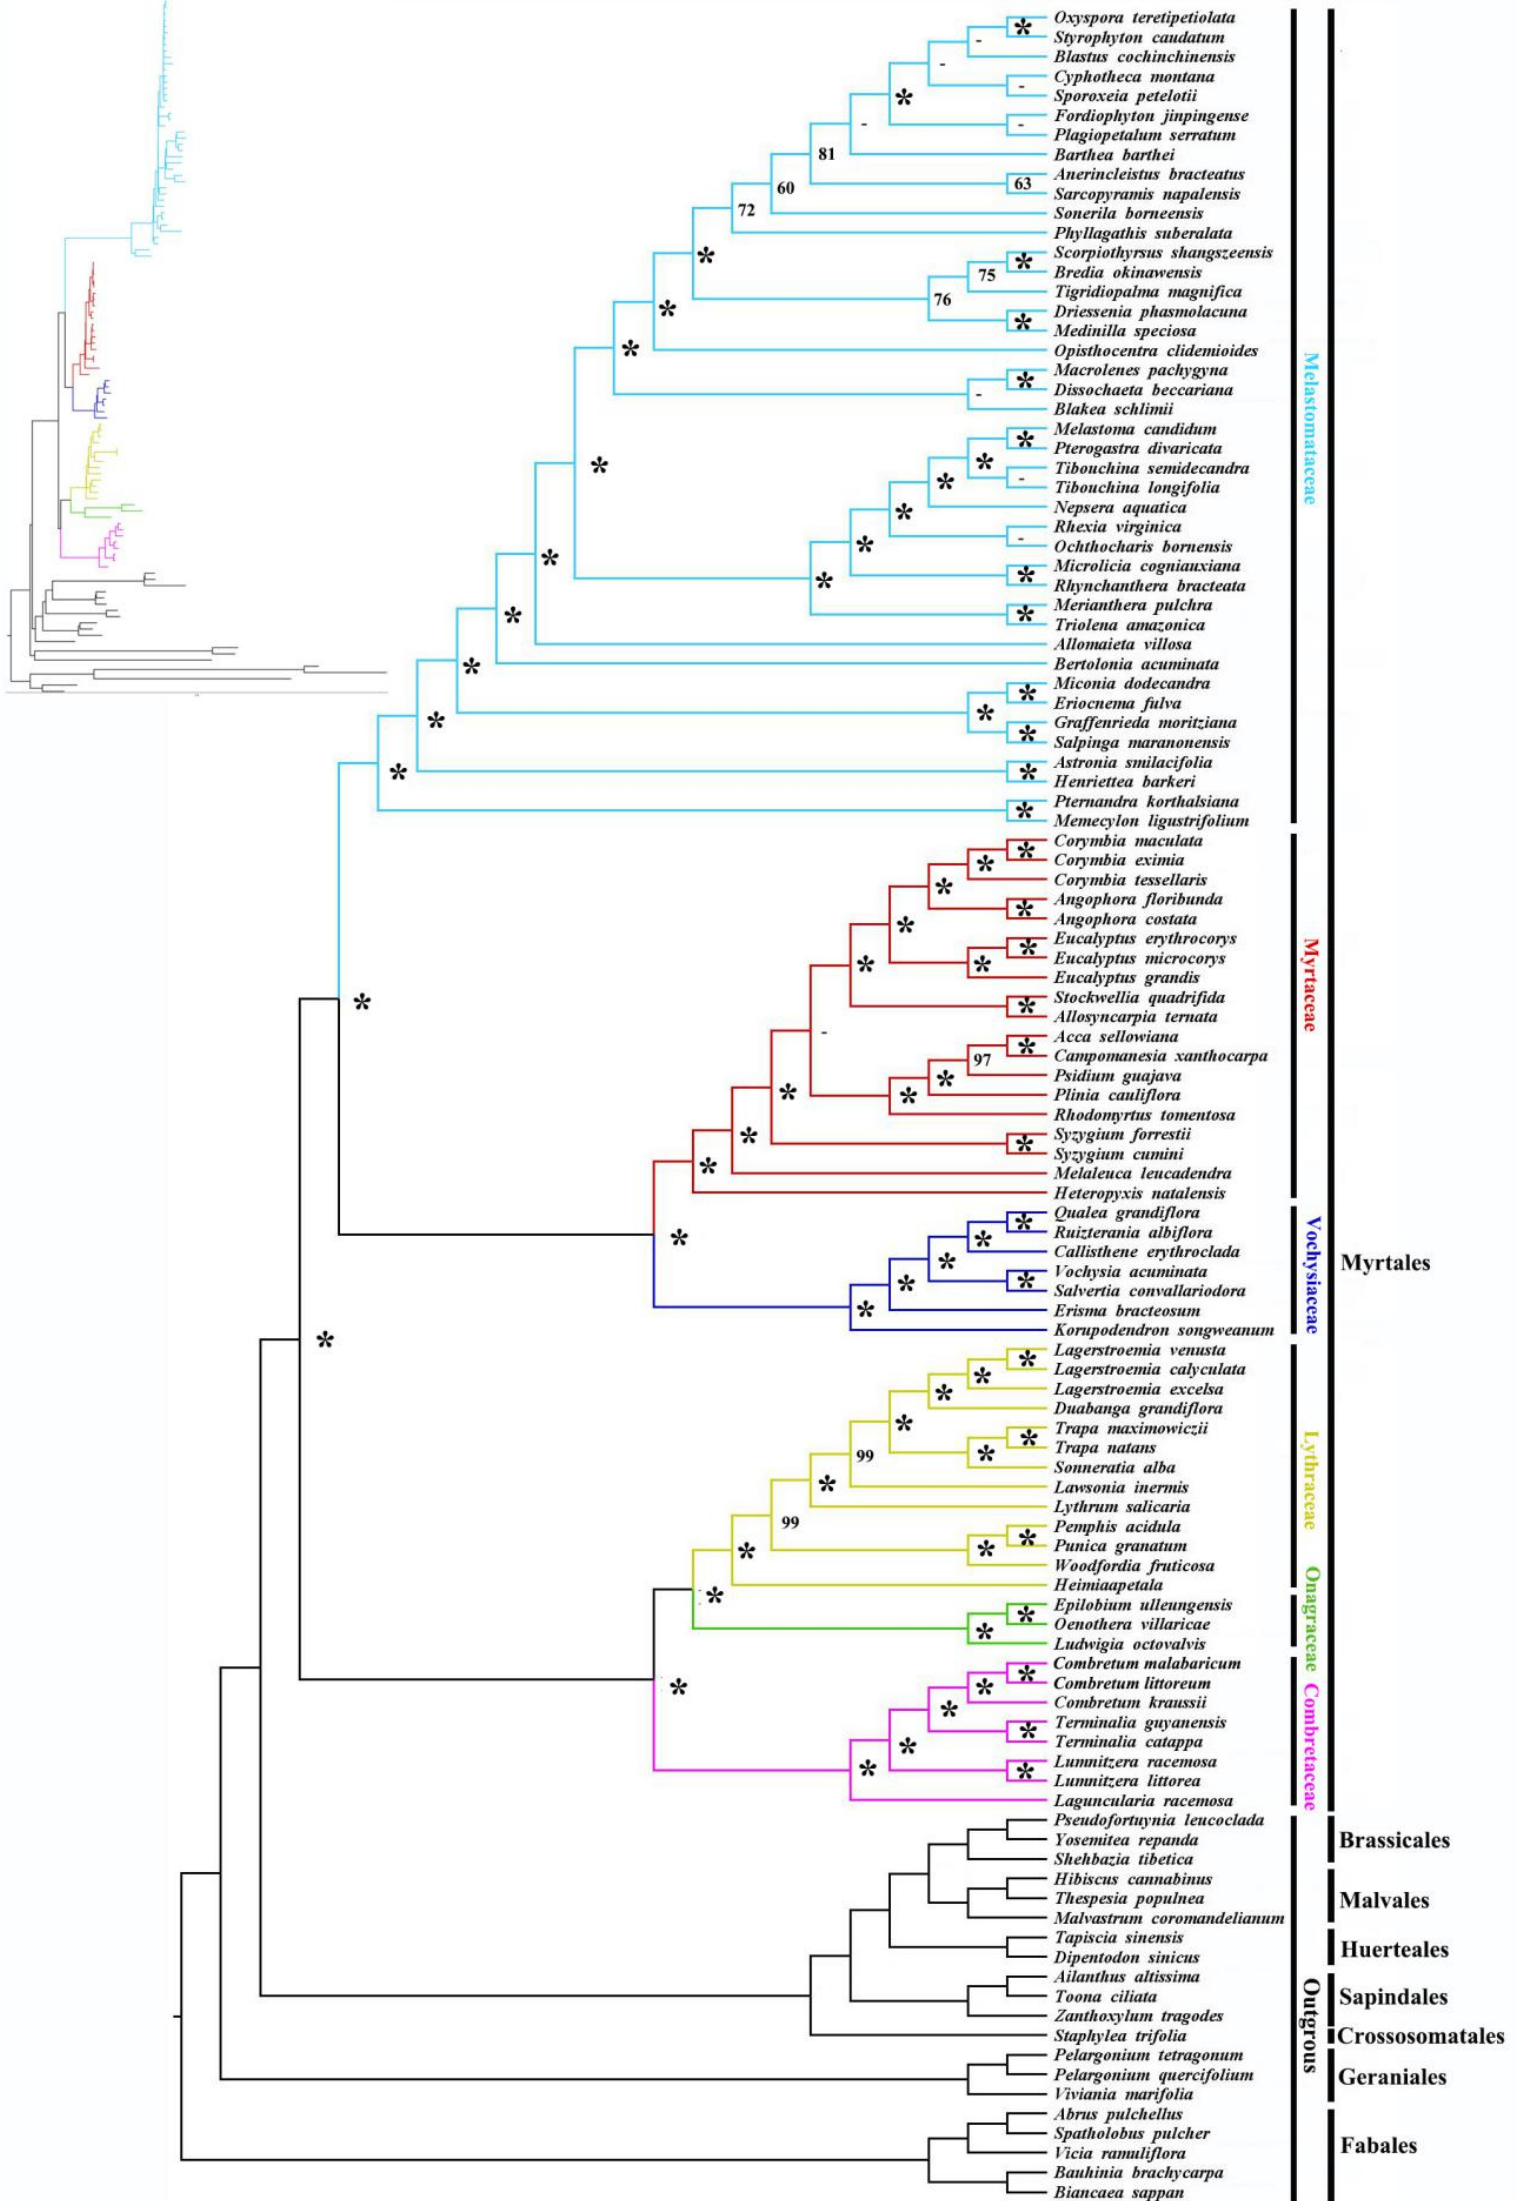

Supplement: 12870_2021_2985_MOESM2_ESM.pdf [file 12870_2021_2985_MOESM2_ESM.pdf]
